# Supplementary material
Source: publisher site journal article supplement (https://www.spandidos-publications.com/5090/downloadSupplementary)
Supplement: Supplementary file 1 [file downloadSupplementary]

Video S1. Surgical procedure. The surgeon exposes the dura mater, then exposes the tumor, separates the tumor from surrounding tissue, and finally removes the tumor.
